# Supplementary material for: Breast cancer subtypes: implications for the treatment and survival of patients in Africa—a prospective cohort study from Mozambique
Source: PubMed Central journal article supplement — ESMO Open. 2020 Oct 5;5(5):e000829. doi: 10.1136/esmoopen-2020-000829 (PMC7537337; doi:10.1136/esmoopen-2020-000829), 2020-10-05
Supplement: esmoopen-2020-000829supp001.pdf [file esmoopen-2020-000829supp001.pdf]

## Supplementary material

“Breast cancer subtypes: implications for the treatment and survival of patients in Africa – a prospective cohort study from Mozambique”

Supplementary figure 1 – Participants of the Moza-BC cohort, according to the hospital from which they were included and according to tissue availability for the assessment of breast cancer subtypes

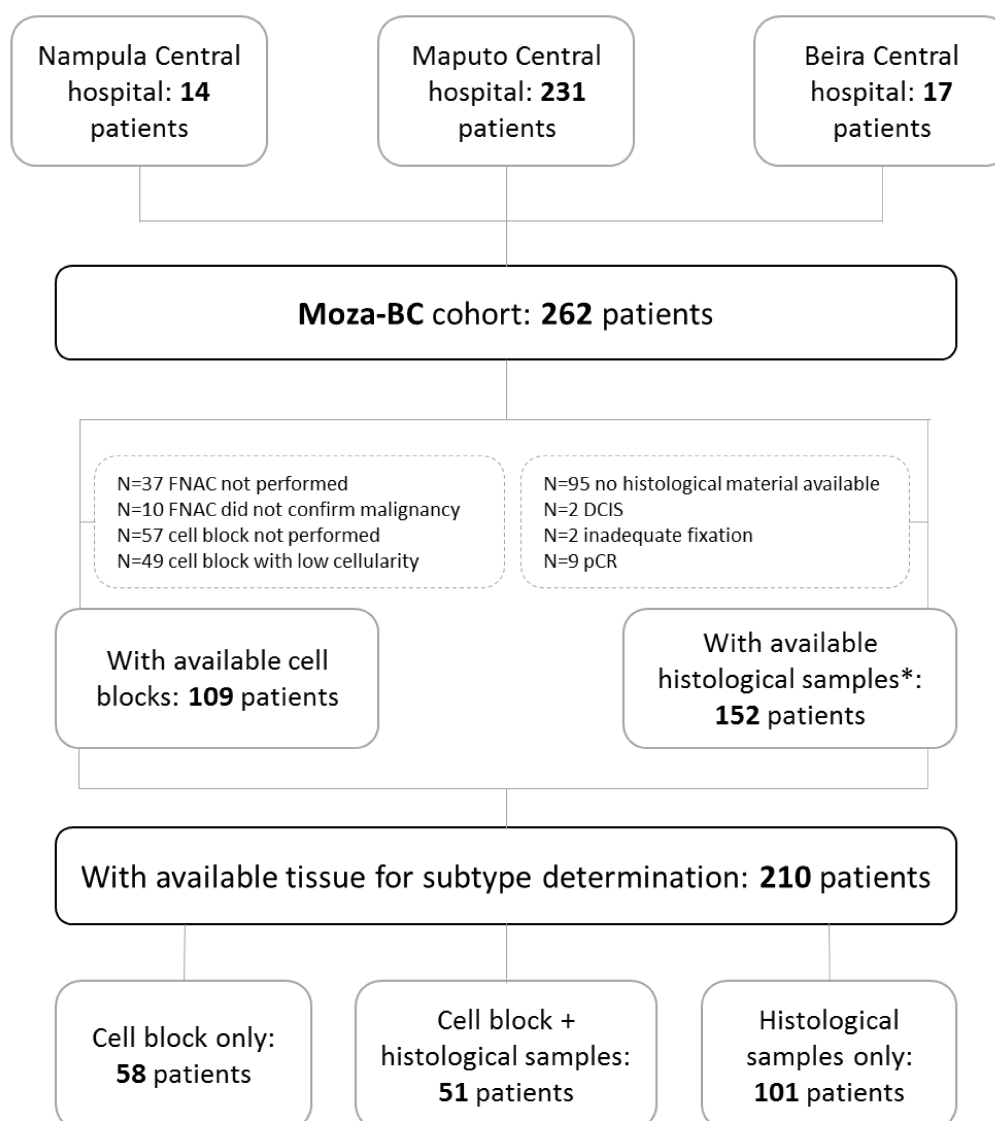

\* 152 patients, with a total of three core needle biopsies, 13 incisional surgical biopsies, 22 excisional surgical biopsies, four tumorectomies and 128 mastectomies.

Supplementary table 1 – Comparison of baseline characteristics of patients included in the Moza-BC cohort with data regarding breast cancer subtypes who were treated at the Oncology Unit of the Maputo Central Hospital (MCH; n=175) vs those who were not treated at the Oncology Unit of the MCH (n=35)

|                                                         | Followed at the<br>MCH,<br>n=175 | Not followed at the<br>MCH, n=35 | P     |
|---------------------------------------------------------|----------------------------------|----------------------------------|-------|
| <b>Age</b> in years (n, %)                              |                                  |                                  | .150  |
| <40                                                     | 44 (25.1)                        | 8 (25.0)                         |       |
| 40-49                                                   | 49 (28.0)                        | 7 (21.9)                         |       |
| 50-59                                                   | 42 (24.0)                        | 4 (12.5)                         |       |
| ≥60                                                     | 40 (22.9)                        | 13 (40.6)                        |       |
| Missing                                                 | 0                                | 3                                |       |
| <b>Race</b> (n, %)                                      |                                  |                                  | .585  |
| Black                                                   | 172 (98.3)                       | 34 (100)                         |       |
| Other <sup>1</sup>                                      | 3 (1.7)                          | 0                                |       |
| Missing                                                 | 0                                | 1                                |       |
| <b>Place of residence</b> (n, %)                        |                                  |                                  | <.001 |
| South (including Maputo)                                | 150 (90.9)                       | 20 (64.5)                        |       |
| Center/North                                            | 15 (9.1)                         | 11 (35.5)                        |       |
| Missing                                                 | 10                               | 4                                |       |
| <b>Classic subtypes</b> (n, %)                          |                                  |                                  | .303  |
| ER-positive/HER2-negative                               | 91 (52.0)                        | 17 (48.6)                        |       |
| HER2-positive                                           | 44 (25.1)                        | 6 (17.1)                         |       |
| TNBC                                                    | 40 (22.9)                        | 12 (34.3)                        |       |
| <b>Surrogate intrinsic subtypes</b> (n, %) <sup>2</sup> |                                  |                                  | .491  |
| Luminal A-like                                          | 25 (14.3)                        | 3 (8.6)                          |       |
| Luminal B-like                                          | 87 (49.7)                        | 16 (45.7)                        |       |
| HER2-enriched                                           | 23 (13.1)                        | 4 (11.4)                         |       |
| Basal-like                                              | 40 (22.9)                        | 12 (34.3)                        |       |
| <b>Tumor characteristics (clinical staging)</b> (n, %)  |                                  |                                  | .293  |
| cT1                                                     | 6 (3.5)                          | 1 (2.9)                          |       |
| cT2                                                     | 43 (24.9)                        | 13 (37.1)                        |       |
| cT3                                                     | 52 (30.1)                        | 12 (34.3)                        |       |
| cT4                                                     | 72 (41.6)                        | 9 (25.7)                         |       |
| Missing                                                 | 2                                | 0                                |       |
| <b>Lymph node status (clinical staging)</b> (n, %)      |                                  |                                  | .068  |
| cN0                                                     | 43 (28.1)                        | 16 (45.7)                        |       |
| cN+                                                     | 110 (71.9)                       | 19 (54.3)                        |       |
| Missing                                                 | 22                               | 0                                |       |

<sup>1</sup>Includes: mixed and Indian race.

<sup>2</sup>Tumors were classified into surrogate intrinsic subtypes according to the St. Gallen classification as: Luminal A-like: estrogen receptor (ER)-positive, progesterone receptor (PR)-positivity≥20%, HER2-negative and Ki67≤29%; Luminal B-like: ER-positive/HER2-negative and either PR-positivity<20% or Ki67>29%, or ER-positive/HER2-positive; HER2-enriched: ER-negative/PR-negative/HER2-positive; and Basal-like: ER-negative/PR-negative/HER2-negative.

cN+: lymph node positive; ER: estrogen receptor; TNBC: triple-negative breast cancer.

Supplementary table 2 – Patients' baseline characteristics according to each breast cancer surrogate intrinsic subtype (St. Gallen classification)

|                                                            | Luminal A-like<br>N=28 | Luminal B-like<br>N=103 | HER2-enriched<br>n=27 | Basal-like<br>n=52 | P           |
|------------------------------------------------------------|------------------------|-------------------------|-----------------------|--------------------|-------------|
| <b>Age</b> in years (n, %)                                 |                        |                         |                       |                    | .769        |
| <40                                                        | 6 (22.2)               | 27 (26.7)               | 5 (18.5)              | 14 (26.9)          |             |
| 40-49                                                      | 7 (25.9)               | 31 (30.7)               | 6 (22.2)              | 12 (23.1)          |             |
| 50-59                                                      | 6 (22.2)               | 23 (22.8)               | 8 (29.6)              | 9 (17.3)           |             |
| ≥60                                                        | 8 (29.6)               | 20 (19.8)               | 8 (29.6)              | 17 (32.7)          |             |
| Missing                                                    | 1                      | 2                       | 0                     | 0                  |             |
| <b>Race</b> (n, %)                                         |                        |                         |                       |                    | <b>.044</b> |
| Black                                                      | 25 (92.6)              | 102 (99.0)              | 27 (100)              | 52 (100)           |             |
| Other <sup>1</sup>                                         | 2 (7.4)                | 1 (1.0)                 | 0                     | 0                  |             |
| Missing                                                    | 1                      | 0                       | 0                     | 0                  |             |
| <b>Education</b> (n, %)                                    |                        |                         |                       |                    | .532        |
| 0 years                                                    | 7 (33.3)               | 17 (24.3)               | 3 (15.0)              | 5 (14.3)           |             |
| 1-4 years                                                  | 2 (9.5)                | 8 (11.4)                | 2 (10.0)              | 7 (20.0)           |             |
| >4 years                                                   | 12 (57.1)              | 45 (64.3)               | 15 (75.0)             | 23 (65.7)          |             |
| Missing                                                    | 7                      | 33                      | 7                     | 17                 |             |
| <b>Place of residence</b> (n, %)                           |                        |                         |                       |                    | .243        |
| South (including Maputo)                                   | 22 (84.6)              | 89 (90.8)               | 22 (88.0)             | 37 (78.7)          |             |
| Center/North                                               | 4 (15.4)               | 9 (9.2)                 | 3 (12.0)              | 10 (21.3)          |             |
| Missing                                                    | 2                      | 5                       | 2                     | 5                  |             |
| <b>Menopausal status</b> (n, %)                            |                        |                         |                       |                    | .907        |
| Pre-menopausal                                             | 13 (52.0)              | 48 (55.2)               | 11 (47.8)             | 20 (50.0)          |             |
| Post-menopausal                                            | 12 (48.0)              | 39 (44.8)               | 12 (52.2)             | 20 (50.0)          |             |
| Missing                                                    | 3                      | 16                      | 4                     | 12                 |             |
| <b>Body mass index</b> (n, %)                              |                        |                         |                       |                    | .250        |
| Under/normal weight (<25 kg/m <sup>2</sup> )               | 9 (39.1)               | 36 (45.0)               | 6 (30.0)              | 10 (27.0)          |             |
| Overweight/obese (≥25 kg/m <sup>2</sup> )                  | 14 (60.9)              | 44 (55.0)               | 14 (70.0)             | 27 (73.0)          |             |
| Missing                                                    | 5                      | 23                      | 7                     | 15                 |             |
| <b>HIV status</b> (n, %) <sup>2</sup>                      |                        |                         |                       |                    | .064        |
| Negative/unknown                                           | 17 (68.0)              | 67 (77.0)               | 21 (91.3)             | 25 (62.5)          |             |
| Positive                                                   | 8 (32.0)               | 20 (23.0)               | 2 (8.7)               | 15 (37.5)          |             |
| Missing                                                    | 3                      | 16                      | 4                     | 12                 |             |
| <b>Tumor characteristics (clinical staging)</b> (n, %)     |                        |                         |                       |                    | .065        |
| cT1                                                        | 3 (10.7)               | 1 (1.0)                 | 2 (7.7)               | 1 (1.9)            |             |
| cT2                                                        | 6 (21.4)               | 27 (26.5)               | 9 (34.6)              | 14 (26.9)          |             |
| cT3                                                        | 6 (21.4)               | 29 (28.4)               | 11 (42.3)             | 18 (34.6)          |             |
| cT4                                                        | 13 (46.4)              | 45 (44.1)               | 4 (15.4)              | 19 (36.5)          |             |
| Missing                                                    | 0                      | 1                       | 1                     | 0                  |             |
| <b>Lymph node status (clinical staging)</b> (n, %)         |                        |                         |                       |                    | .572        |
| cN0                                                        | 9 (36.0)               | 28 (29.8)               | 10 (41.7)             | 12 (26.7)          |             |
| cN+                                                        | 16 (64.0)              | 66 (70.2)               | 14 (58.3)             | 33 (73.3)          |             |
| Missing                                                    | 3                      | 9                       | 3                     | 7                  |             |
| <b>Tumor characteristics (pathological staging)</b> (n, %) |                        |                         |                       |                    | .101        |
| (y)pT0/Tis                                                 | 0                      | 5 (6.5)                 | 0                     | 2 (5.9)            |             |
| (y)pT1                                                     | 7 (33.3)               | 10 (13.0)               | 6 (27.3)              | 7 (20.6)           |             |
| (y)pT2                                                     | 8 (38.1)               | 31 (40.3)               | 13 (59.1)             | 10 (29.4)          |             |
| (y)pT3                                                     | 2 (9.5)                | 17 (22.1)               | 3 (13.6)              | 11 (32.4)          |             |
| (y)pT4                                                     | 4 (19.0)               | 14 (18.2)               | 0                     | 4 (11.8)           |             |
| Missing                                                    | 7                      | 26                      | 5                     | 8                  |             |
| <b>Lymph node status (pathological staging)</b> (n, %)     |                        |                         |                       |                    | .916        |
| (y)pN0                                                     | 4 (28.6)               | 15 (24.2)               | 5 (23.8)              | 9 (31.0)           |             |
| (y)pN1                                                     | 7 (50.0)               | 22 (35.5)               | 7 (33.3)              | 11 (37.9)          |             |
| (y)pN2                                                     | 2 (14.3)               | 16 (25.8)               | 6 (28.6)              | 4 (13.8)           |             |
| (y)pN3                                                     | 1 (7.1)                | 9 (14.5)                | 3 (14.3)              | 5 (17.2)           |             |
| Missing                                                    | 14                     | 41                      | 6                     | 23                 |             |
| <b>Median tumor size</b> at surgery in mm (median, range)  | 35 (12-120)            | 40 (0-180)              | 40 (2.5-80)           | 45 (0-180)         | <b>.046</b> |
| Missing                                                    | 8                      | 26                      | 5                     | 18                 |             |

|                                                   |           |           |           |           |      |
|---------------------------------------------------|-----------|-----------|-----------|-----------|------|
| <b>Multifocal tumors</b> at surgery (n, %)        |           |           |           |           | .933 |
| No                                                | 15 (88.2) | 66 (90.4) | 18 (85.7) | 28 (90.3) |      |
| Yes                                               | 2 (11.8)  | 7 (9.6)   | 3 (14.3)  | 3 (9.7)   |      |
| Missing                                           | 11        | 30        | 6         | 21        |      |
| <b>Lympho-vascular invasion</b> at surgery (n, %) |           |           |           |           | .791 |
| No                                                | 5 (35.7)  | 16 (24.2) | 5 (23.8)  | 9 (30.0)  |      |
| Yes                                               | 9 (64.3)  | 50 (75.8) | 16 (76.2) | 21 (70.0) |      |
| Missing                                           | 12        | 37        | 6         | 22        |      |
| <b>Perineural invasion</b> at surgery (n, %)      |           |           |           |           | .803 |
| No                                                | 11 (78.6) | 49 (74.2) | 16 (76.2) | 25 (83.3) |      |
| Yes                                               | 3 (21.4)  | 17 (25.8) | 5 (23.8)  | 5 (16.7)  |      |
| Missing                                           | 12        | 37        | 6         | 22        |      |
| <b>Histological grade</b> at surgery (n, %)       |           |           |           |           | .038 |
| 1                                                 | 4 (20.0)  | 18 (25.0) | 8 (38.1)  | 5 (16.1)  |      |
| 2                                                 | 11 (55.0) | 37 (51.4) | 7 (33.3)  | 9 (29.0)  |      |
| 3                                                 | 5 (25.0)  | 17 (23.6) | 6 (28.6)  | 17 (54.8) |      |
| Missing                                           | 8         | 31        | 6         | 21        |      |
| <b>Histological subtype</b> at surgery (n, %)     |           |           |           |           | .661 |
| No residual tumor/ <i>in situ</i> carcinoma       | 0         | 5 (6.4)   | 0         | 2 (5.7)   |      |
| Invasive ductal carcinoma (NST)                   | 18 (90.9) | 63 (80.8) | 19 (90.5) | 31 (88.6) |      |
| Other invasive subtypes <sup>3</sup>              | 2 (10.0)  | 10 (12.8) | 2 (9.5)   | 2 (5.7)   |      |
| Missing                                           | 8         | 25        | 6         | 17        |      |
| <b>Stage</b> at diagnosis (n, %)                  |           |           |           |           | .285 |
| I                                                 | 0         | 1 (1.1)   | 1 (4.3)   | 1 (2.5)   |      |
| II                                                | 8 (32.0)  | 13 (14.9) | 8 (34.8)  | 12 (30.0) |      |
| III                                               | 13 (52.0) | 56 (64.4) | 12 (52.2) | 18 (45.0) |      |
| IV                                                | 4 (16.0)  | 17 (19.5) | 2 (8.7)   | 9 (22.5)  |      |
| Missing <sup>4</sup>                              | 3         | 16        | 4         | 12        |      |

<sup>1</sup>Includes: mixed and Indian race.

<sup>2</sup>Seven patients had unknown HIV status; among HIV-positive patients, 31 (69%) had been previously diagnosed; the median time since HIV diagnosis was 3.93 years (range: 0.1-11.7); 41 (91%) patients were under anti-retroviral treatment (ART) when starting chemotherapy, mostly with the TDF+3TC+EFV regimen (28 patients); the median time under ART was 2 years (range 0.1-11.7); the median CD4+ cells count was 448 cells/ $\mu$ L (range 43-1104) and 39 (87%) patients had a CD4+ cells count > 200/ $\mu$ L.

<sup>3</sup>Includes: lobular, mixed, papillary, squamous cell carcinoma, metaplastic and mucinous breast cancer.

<sup>4</sup>Includes the 35 patients for whom there is available cT/N and/or (y)pT/N status, but without information regarding the presence of metastases.

NST: no special type.

Supplementary table 3 – Breast cancer clinical management according to each surrogate intrinsic subtype (St. Gallen classification)

|                                                           | Luminal A-like<br>N=28 | Luminal B-like<br>N=103 | HER2-enriched<br>N=27 | Basal-like<br>n=52 | P    |
|-----------------------------------------------------------|------------------------|-------------------------|-----------------------|--------------------|------|
| <b>Time from first symptom to diagnosis (n, %)</b>        |                        |                         |                       |                    | .409 |
| <180 days                                                 | 5 (35.7)               | 31 (53.4)               | 7 (50.0)              | 13 (65.0)          |      |
| ≥180 days                                                 | 9 (64.3)               | 27 (46.6)               | 7 (50.0)              | 7 (35.0)           |      |
| Missing                                                   | 14                     | 45                      | 13                    | 32                 |      |
| <b>Timing of diagnosis (n, %)</b>                         |                        |                         |                       |                    | .127 |
| Pre-MTB implementation                                    | 10 (40.0)              | 50 (57.5)               | 8 (34.8)              | 23 (57.5)          |      |
| Post-MTB implementation                                   | 15 (60.0)              | 37 (42.5)               | 15 (65.2)             | 17 (42.5)          |      |
| Not applicable <sup>1</sup>                               | 3                      | 16                      | 4                     | 12                 |      |
| <b>Type of first treatment received (n, %)</b>            |                        |                         |                       |                    | .225 |
| No treatment received                                     | 0                      | 1 (1.2)                 | 0                     | 2 (5.0)            |      |
| Surgery                                                   | 5 (20.0)               | 18 (20.9)               | 8 (34.8)              | 14 (35.0)          |      |
| Chemotherapy/Endocrine therapy <sup>2</sup>               | 20 (80.0)              | 67 (77.9)               | 15 (65.2)             | 24 (60.0)          |      |
| Missing                                                   | 3                      | 17                      | 4                     | 12                 |      |
| <b>Time from diagnosis until first treatment (n, %)</b>   |                        |                         |                       |                    | .007 |
| <45 days                                                  | 11 (44.0)              | 33 (38.8)               | 18 (78.3)             | 21 (55.3)          |      |
| ≥45 days                                                  | 14 (56.0)              | 52 (61.2)               | 5 (21.7)              | 17 (44.7)          |      |
| Missing                                                   | 3                      | 18                      | 4                     | 14                 |      |
| <b>Surgery (ever) (n, %)</b>                              |                        |                         |                       |                    | .094 |
| No                                                        | 7 (26.9)               | 10 (11.4)               | 1 (4.0)               | 6 (15.0)           |      |
| Yes                                                       | 19 (73.1)              | 78 (88.6)               | 24 (96.0)             | 34 (85.0)          |      |
| Missing                                                   | 2                      | 15                      | 2                     | 12                 |      |
| <b>Surgical intent (n, %)<sup>3</sup></b>                 |                        |                         |                       |                    | .562 |
| Diagnostic                                                | 0                      | 3 (3.8)                 | 1 (4.2)               | 1 (2.9)            |      |
| Curative                                                  | 17 (89.5)              | 61 (78.2)               | 20 (83.3)             | 28 (82.4)          |      |
| Palliative                                                | 0                      | 11 (14.1)               | 1 (4.2)               | 2 (5.9)            |      |
| Unknown                                                   | 2 (10.5)               | 3 (3.8)                 | 2 (8.3)               | 3 (8.8)            |      |
| <b>Type of breast surgery (n, %)<sup>4</sup></b>          |                        |                         |                       |                    | .503 |
| Total mastectomy                                          | 17 (89.5)              | 73 (93.6)               | 21 (87.5)             | 33 (97.1)          |      |
| Tumorectomy                                               | 2 (10.5)               | 5 (6.4)                 | 3 (12.5)              | 1 (2.9)            |      |
| <b>Status of surgical margins (n, %)</b>                  |                        |                         |                       |                    | .521 |
| Clean                                                     | 16 (94.1)              | 64 (90.1)               | 20 (95.2)             | 26 (83.9)          |      |
| Positive                                                  | 1 (5.9)                | 7 (9.9)                 | 1 (4.8)               | 5 (16.1)           |      |
| Missing                                                   | 2                      | 7                       | 3                     | 3                  |      |
| <b>Axillary surgery – type (n, %)<sup>5</sup></b>         |                        |                         |                       |                    | .799 |
| Axillary dissection                                       | 16 (100)               | 68 (98.6)               | 22 (100)              | 31 (100)           |      |
| Sentinel lymph node biopsy                                | 0                      | 1 (1.4)                 | 0                     | 0                  |      |
| Not done/missing                                          | 3                      | 9                       | 2                     | 3                  |      |
| <b>Axillary surgery – completeness (n, %)<sup>6</sup></b> |                        |                         |                       |                    | .577 |
| Not done/no isolated lymph nodes                          | 3 (15.8)               | 9 (11.7)                | 2 (9.1)               | 3 (9.1)            |      |
| Incomplete                                                | 4 (21.1)               | 22 (28.6)               | 2 (9.1)               | 9 (27.3)           |      |
| Complete                                                  | 12 (63.2)              | 46 (59.7)               | 18 (81.8)             | 21 (63.6)          |      |
| Missing                                                   | 0                      | 1                       | 2                     | 1                  |      |
| <b>Chemotherapy (ever received) (n, %)</b>                |                        |                         |                       |                    | .619 |
| No                                                        | 1 (4.0)                | 4 (4.6)                 | 1 (4.3)               | 4 (10.0)           |      |
| Yes                                                       | 24 (96.0)              | 83 (95.4)               | 22 (95.7)             | 36 (90.0)          |      |
| Missing                                                   | 1                      | 16                      | 4                     | 12                 |      |
| <b>Intent of first-line CT (n, %)<sup>7</sup></b>         |                        |                         |                       |                    | .170 |
| Neoadjuvant only                                          | 7 (29.2)               | 9 (10.8)                | 2 (9.1)               | 2 (5.6)            |      |
| Neoadjuvant + adjuvant                                    | 10 (41.7)              | 45 (54.2)               | 12 (54.5)             | 16 (44.4)          |      |
| Adjuvant only                                             | 3 (12.5)               | 13 (15.7)               | 6 (27.3)              | 10 (27.8)          |      |
| Palliative                                                | 4 (16.7)               | 16 (19.3)               | 2 (9.1)               | 8 (22.2)           |      |
| <b>Neoadjuvant CT – outcome (n, %)</b>                    |                        |                         |                       |                    | .174 |
| Same stage                                                | 4 (23.5)               | 17 (31.5)               | 6 (42.9)              | 10 (55.6)          |      |
| Upstaging                                                 | 1 (5.9)                | 10 (18.5)               | 2 (14.3)              | 1 (5.6)            |      |
| Downstaging                                               | 7 (41.2)               | 21 (38.9)               | 6 (42.9)              | 6 (33.3)           |      |
| Unknown <sup>8</sup>                                      | 1 (5.9)                | 6 (11.1)                | 0                     | 1 (5.6)            |      |

|                                                                           |               |              |               |               |       |
|---------------------------------------------------------------------------|---------------|--------------|---------------|---------------|-------|
| <b>pCR rate after neoadjuvant CT (n, %)</b>                               |               |              |               |               | .762  |
| No pCR                                                                    | 17 (100)      | 50 (90.9)    | 14 (100)      | 16 (88.9)     |       |
| pCR only in the breast (ypT0/is)                                          | 0             | 3 (5.5)      | 0             | 1 (5.6)       |       |
| pCR in the breast and lymph nodes (ypT0/is, ypN0)                         | 0             | 2 (3.6)      | 0             | 1 (5.6)       |       |
| <b>Type of first-line CT regimen (n, %)<sup>7</sup></b>                   |               |              |               |               | .066  |
| Anthracycline-based only                                                  | 14 (58.3)     | 38 (45.8)    | 4 (18.2)      | 20 (55.6)     |       |
| Anthracyclines + taxanes based                                            | 10 (41.7)     | 41 (49.4)    | 17 (77.3)     | 15 (41.7)     |       |
| Other <sup>9</sup>                                                        | 0             | 4 (4.8)      | 1 (4.5)       | 1 (2.8)       |       |
| <b>First-line CT dose-intensity (n, %)<sup>7</sup></b>                    |               |              |               |               | .204  |
| <85%                                                                      | 16 (69.6)     | 41 (51.9)    | 10 (50.0)     | 24 (68.6)     |       |
| ≥85%                                                                      | 7 (30.4)      | 38 (48.1)    | 10 (50.0)     | 11 (31.4)     |       |
| Missing                                                                   | 1             | 4            | 2             | 1             |       |
| <b>Cumulative dose of doxorubicin in mg/m<sup>2</sup> (median, range)</b> | 240 (180-360) | 240 (60-420) | 240 (180-360) | 240 (120-360) | .588  |
| <b>Endocrine therapy (ever) (n, %)</b>                                    |               |              |               |               | <.001 |
| No                                                                        | 9 (36.0)      | 28 (32.6)    | 12 (52.2)     | 31 (79.5)     |       |
| Yes                                                                       | 16 (64.0)     | 58 (67.4)    | 11 (47.8)     | 8 (20.5)      |       |
| Missing                                                                   | 1             | 17           | 4             | 13            |       |
| <b>Radiotherapy (ever) (n, %)</b>                                         |               |              |               |               | .222  |
| No                                                                        | 23 (92.0)     | 83 (96.5)    | 20 (87.0)     | 39 (97.5)     |       |
| Yes                                                                       | 2 (8.0)       | 3 (3.5)      | 3 (13.0)      | 1 (2.5)       |       |
| Missing                                                                   | 1             | 17           | 4             | 12            |       |

<sup>1</sup>Not applicable as patients were not treated/followed at the Maputo Central Hospital and, therefore, were not discussed by the multidisciplinary tumor board.

<sup>2</sup>One patient received endocrine therapy as first treatment, who had a Luminal B-like tumor.

<sup>3</sup>Patients submitted to a surgical biopsy with diagnostic intent followed by a tumorectomy or a mastectomy with curative intent were included in the "Curative" intent group.

<sup>4</sup>Patients submitted to a tumorectomy followed by a mastectomy were included in the "Mastectomy" group.

<sup>5</sup>One patient received a sentinel lymph node biopsy followed by an axillary dissection and was, therefore, included in the "axillary dissection" group.

<sup>6</sup>Among patients receiving any type of breast surgery (n=155). Not done: not done or no isolated lymph nodes; incomplete: 1-5 isolated lymph nodes (in case of axillary lymph node dissection); complete: ≥6 isolated lymph nodes (in case of axillary lymph node dissection) or ≥1 isolated lymph nodes with ≤2 positive lymph nodes (in case of sentinel lymph node biopsy).

<sup>7</sup>First line of chemotherapy that the patient received includes neoadjuvant, adjuvant or palliative treatment. If the patient received part of chemotherapy as neoadjuvant (e.g. AC regimen), and another part as adjuvant chemotherapy (e.g. paclitaxel), the type of regimen, dose-intensity and abandonment refers to the entire scheme (neoadjuvant plus adjuvant).

<sup>8</sup>Cases in whom there was missing data regarding clinical staging or patient abandoned treatment.

<sup>9</sup>Includes: taxane-based CT (three patients), non-anthracycline/non-taxane-based CT (two patients) and unknown regimen (one patient). The preferred anthracycline-containing regimen was AC (cyclophosphamide 600 mg/m<sup>2</sup> and doxorubicin 60 mg/m<sup>2</sup> every three weeks) and the preferred taxane used was paclitaxel (175 mg/m<sup>2</sup> every three weeks); dose-dense regimens were not used due to the unpredictable availability of granulocyte-colony stimulating factors.

CT: chemotherapy; ER: estrogen receptor; MTB: multidisciplinary tumor board; pCR: pathological complete response.

Supplementary Table 4 – Overall survival and disease-free survival estimates and multivariable analysis separately for stages I-II and III-IV, according to classic and surrogate intrinsic subtypes

|                                     | N  | 3-year overall survival<br>% (95% CI)      | P <sup>1</sup> | Adjusted HR (95% CI) <sup>2</sup> |
|-------------------------------------|----|--------------------------------------------|----------------|-----------------------------------|
| <b>Stages I-II</b>                  |    |                                            |                |                                   |
| <b>Classic subtypes</b>             |    |                                            |                |                                   |
| ER-positive/HER2-negative           | 15 | 77.0 (43.9-92.0)                           | 0.228          | 1                                 |
| HER2-positive                       | 16 | 92.9 (59.1-99.0)                           |                | 0.27 (0.03-2.65)                  |
| TNBC                                | 13 | 57.0 (24.3-80.0)                           |                | 1.13 (0.25-5.20)                  |
| <b>Surrogate intrinsic subtypes</b> |    |                                            |                |                                   |
| Luminal A-like                      | 8  | 75.0 (31.5-93.1)                           | 0.201          | 1                                 |
| Luminal B-like                      | 14 | 84.6 (51.2-95.9)                           |                | 0.66 (0.10-4.33)                  |
| HER2-Enriched                       | 9  | 100                                        |                | NC                                |
| Basal-like                          | 13 | 57.0 (24.3-80.0)                           |                | 1.00 (0.21-4.82)                  |
| <b>Stages III-IV</b>                |    |                                            |                |                                   |
| <b>Classic subtypes</b>             |    |                                            |                |                                   |
| ER-positive/HER2-negative           | 76 | 57.9 (45.1-68.7)                           | <0.001         | 1                                 |
| HER2-positive                       | 28 | 32.1 (14.9-50.8)                           |                | <b>2.16 (1.23-3.80)</b>           |
| TNBC                                | 27 | 21.0 (7.8-38.5)                            |                | <b>3.39 (1.91-6.01)</b>           |
| <b>Surrogate intrinsic subtypes</b> |    |                                            |                |                                   |
| Luminal A-like                      | 17 | 57.0 (30.3-76.8)                           | <b>0.004</b>   | 1                                 |
| Luminal B-like                      | 73 | 51.7 (38.8-63.1)                           |                | 0.82 (0.35-1.87)                  |
| HER2-Enriched                       | 14 | 42.9 (17.7-66.0)                           |                | 1.47 (0.52-4.12)                  |
| Basal-like                          | 27 | 21.0 (7.8-38.5)                            |                | 2.38 (0.99-5.68)                  |
|                                     | N  | 3-year disease-free survival<br>% (95% CI) | P <sup>1</sup> | Adjusted HR (95% CI) <sup>2</sup> |
| <b>Stages I-II</b>                  |    |                                            |                |                                   |
| <b>Classic subtypes</b>             |    |                                            |                |                                   |
| ER-positive/HER2-negative           | 15 | 64.7 (34.4-83.7)                           | 0.155          | 1                                 |
| HER2-positive                       | 16 | 92.9 (59.1-99.9)                           |                | 0.21 (0.02-1.94)                  |
| TNBC                                | 13 | 57.0 (24.3-80.0)                           |                | 0.92 (0.22-3.90)                  |
| <b>Surrogate intrinsic subtypes</b> |    |                                            |                |                                   |
| Luminal A-like                      | 8  | 62.5 (22.9-86.1)                           | 0.298          | 1                                 |
| Luminal B-like                      | 14 | 77.4 (4.9-92.1)                            |                | 0.78 (0.15-4.17)                  |
| HER2-Enriched                       | 9  | 100%                                       |                | NC                                |
| Basal-like                          | 13 | 57.0 (24.3-80.0)                           |                | 0.91 (0.19-4.42)                  |
| <b>Stage III</b>                    |    |                                            |                |                                   |
| <b>Classic subtypes</b>             |    |                                            |                |                                   |
| ER-positive/HER2-negative           | 58 | 50.0 (36.3-62.3)                           | <0.001         | 1                                 |
| HER2-positive                       | 23 | 23.2 (8.1-42.8)                            |                | <b>2.08 (1.15-3.79)</b>           |
| TNBC                                | 18 | 5.6 (0.4-22.4)                             |                | <b>3.52 (1.88-6.60)</b>           |
| <b>Surrogate intrinsic subtypes</b> |    |                                            |                |                                   |
| Luminal A-like                      | 13 | 46.2 (19.2-69.6)                           | <b>0.005</b>   | 1                                 |
| Luminal B-like                      | 56 | 44.1 (30.5-57.0)                           |                | 0.99 (0.42-2.31)                  |
| HER2-Enriched                       | 12 | 33.3 (10.3-58.8)                           |                | 1.90 (0.65-5.59)                  |
| Basal-like                          | 18 | 5.6 (0.4-22.4)                             |                | <b>3.11 (1.25-7.70)</b>           |

<sup>1</sup>p value for the univariable survival analysis.

<sup>2</sup>Adjusted for age (<40 vs 40-49 vs 50-59 vs ≥60 years), HIV status (negative/unknown vs positive) and date of diagnosis (pre- vs post-multidisciplinary tumor board implementation).

ER: estrogen receptor; NC: non-calculable;

Supplementary table 5 – Concordance between cell blocks and histological samples for the estrogen receptor, the progesterone receptor, HER2 and Ki67 status in patients with both samples available (n=51)<sup>1</sup>

|               | Histological samples |                    | Concordance (%)    | κ     |
|---------------|----------------------|--------------------|--------------------|-------|
|               | ER-negative          | ER-positive        |                    |       |
| ER-negative   | 20                   | 3                  | 88.2%              | 0.762 |
| ER-positive   | 3                    | 25                 |                    |       |
| Cell blocks   | PR-negative          | PR-positive        | 80.4%              | 0.574 |
|               | PR-negative          | PR-positive        |                    |       |
|               | PR-positive          | PR-positive        | 83.7% <sup>2</sup> | 0.603 |
|               | PR-positive          | PR-positive        |                    |       |
| HER2-negative | HER2-positive        | 76.1% <sup>3</sup> | 0.271              |       |
| HER2-positive | HER2-positive        |                    |                    |       |
| Ki67 low      | Ki67 low             |                    |                    |       |
| Ki67 high     | Ki67 high            |                    |                    |       |

<sup>1</sup>Positive estrogen receptor (ER) and progesterone receptor (PR) status were defined with a  $\geq 1\%$  cut-off, and high Ki67 was defined as  $>29\%$ . HER2-positivity was defined as an immunohistochemistry score of 3+ and/or a score of 2+ with an amplified silver *in situ* hybridization (SISH) test.

<sup>2</sup>Regarding HER2 evaluation, there were two surgical samples for which the immunohistochemistry score was 2+ (equivocal), but for which the SISH test was not successful.

<sup>3</sup>Regarding Ki67 evaluation, there were five samples (two cell blocks and three surgical samples) in which Ki67 was not tested.



Supplementary table 6 – Concordance for the estrogen receptor, the progesterone receptor, HER2 and Ki67 status in the 15 cell blocks submitted to re-staining and re-evaluation in Portugal by a third pathologist (quality control)<sup>1</sup>

|            |             | Portugal    |             |    | Concordance (%)    | κ     |
|------------|-------------|-------------|-------------|----|--------------------|-------|
|            |             | ER-negative | ER-positive |    |                    |       |
| Mozambique | ER-negative | 4           | 1           |    | 93.3%              | 0.842 |
|            | ER-positive | 0           | 10          |    |                    |       |
|            |             | PR-         | PR+         |    | 93.3%              | 0.857 |
|            | PR-negative | 5           | 1           |    |                    |       |
|            | PR-positive | 0           | 9           |    |                    |       |
|            |             | HER2 0/1+   | 2+          | 3+ | 80.0%              | 0.541 |
|            | HER2 0/1+   | 10          | 0           | 0  |                    |       |
|            | HER2 2+     | 1           | 1           | 0  |                    |       |
|            | HER2 3+     | 1           | 1           | 1  |                    |       |
|            |             | Ki67 low    | Ki67 high   |    | 50.0% <sup>2</sup> | 0.248 |
| Ki67 low   | 6           | 4           |             |    |                    |       |
| Ki67 high  | 3           | 1           |             |    |                    |       |

<sup>1</sup>Positive estrogen receptor (ER) and progesterone receptor (PR) status defined with a  $\geq 1\%$  cut-off and high Ki67 was defined as  $>29\%$ .

<sup>2</sup>Regarding Ki67 evaluation, there was one sample in which Ki67 was not tested.
